# Supplementary figures and images for: Mechanistic insights into the active site and allosteric communication pathways in human nonmuscle myosin-2C
Source: eLife journal article supplement (doi:10.7554/elife.32742), 2017-12-19

Figure 3 - Figure supplement 1

A

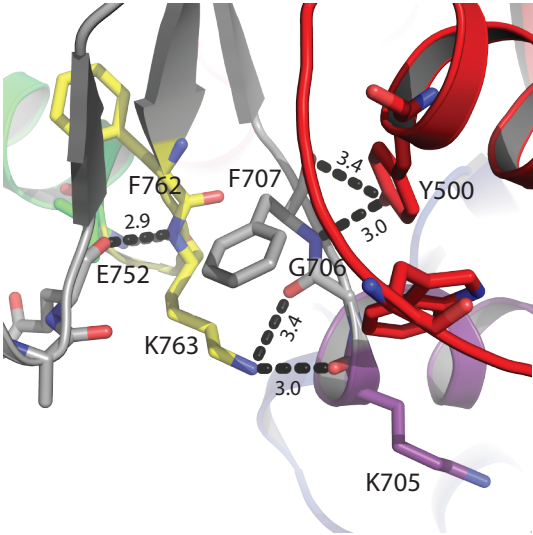

B

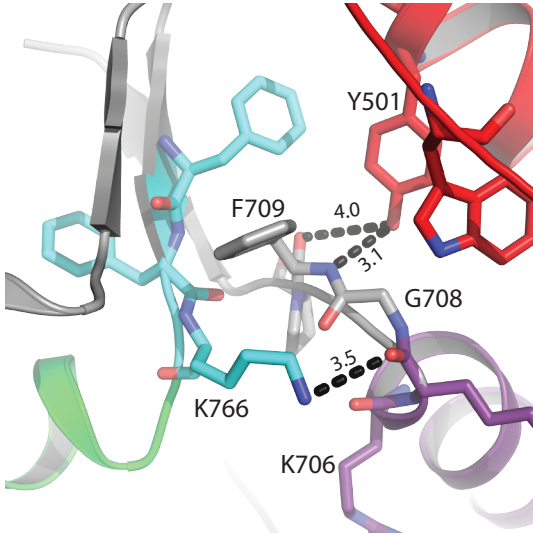

C

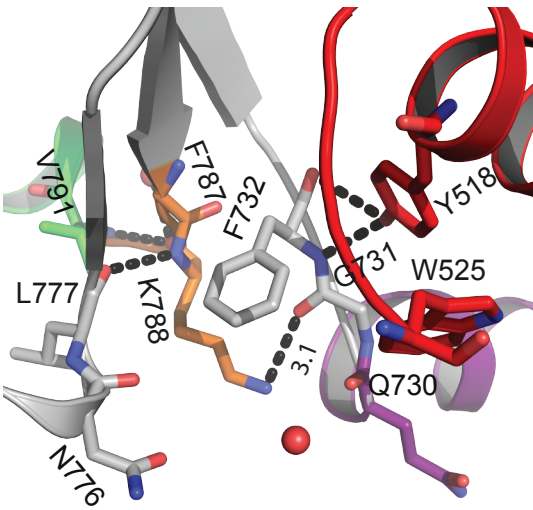

D

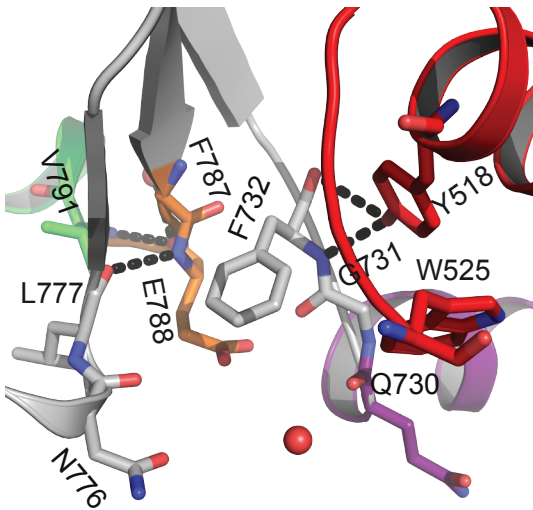

Supplement: supp [file elife-32742-supp-v1.zip]

Figure 2 - Figure supplement 1

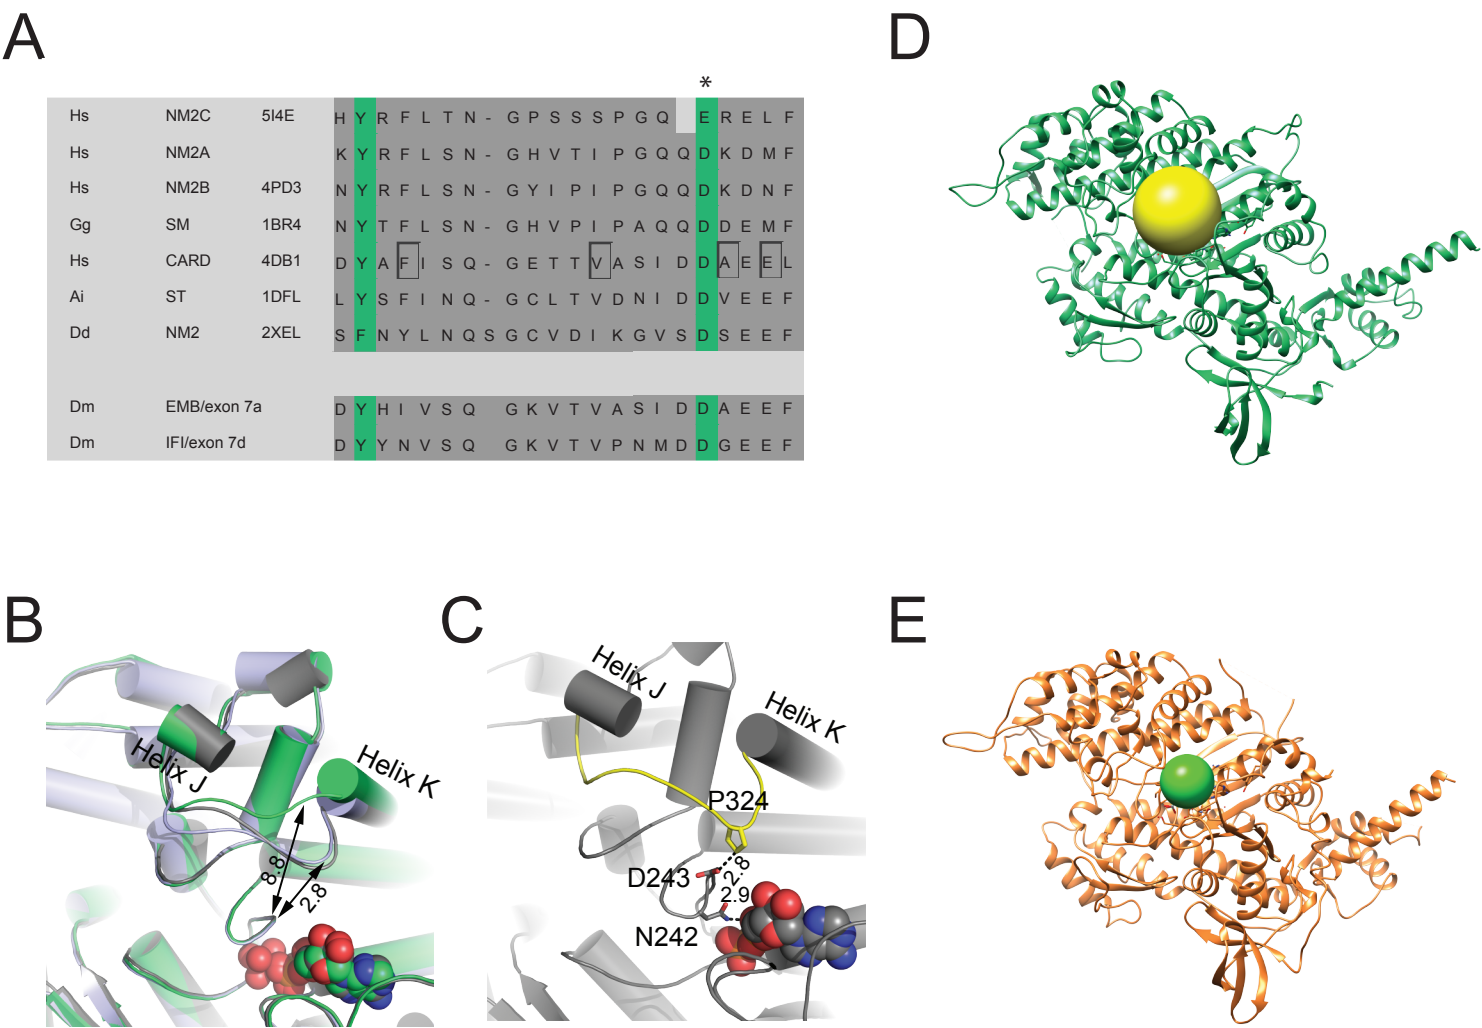

Supplement: supp [file elife-32742-supp-v1.zip]

Figure 4 - Figure supplement 1

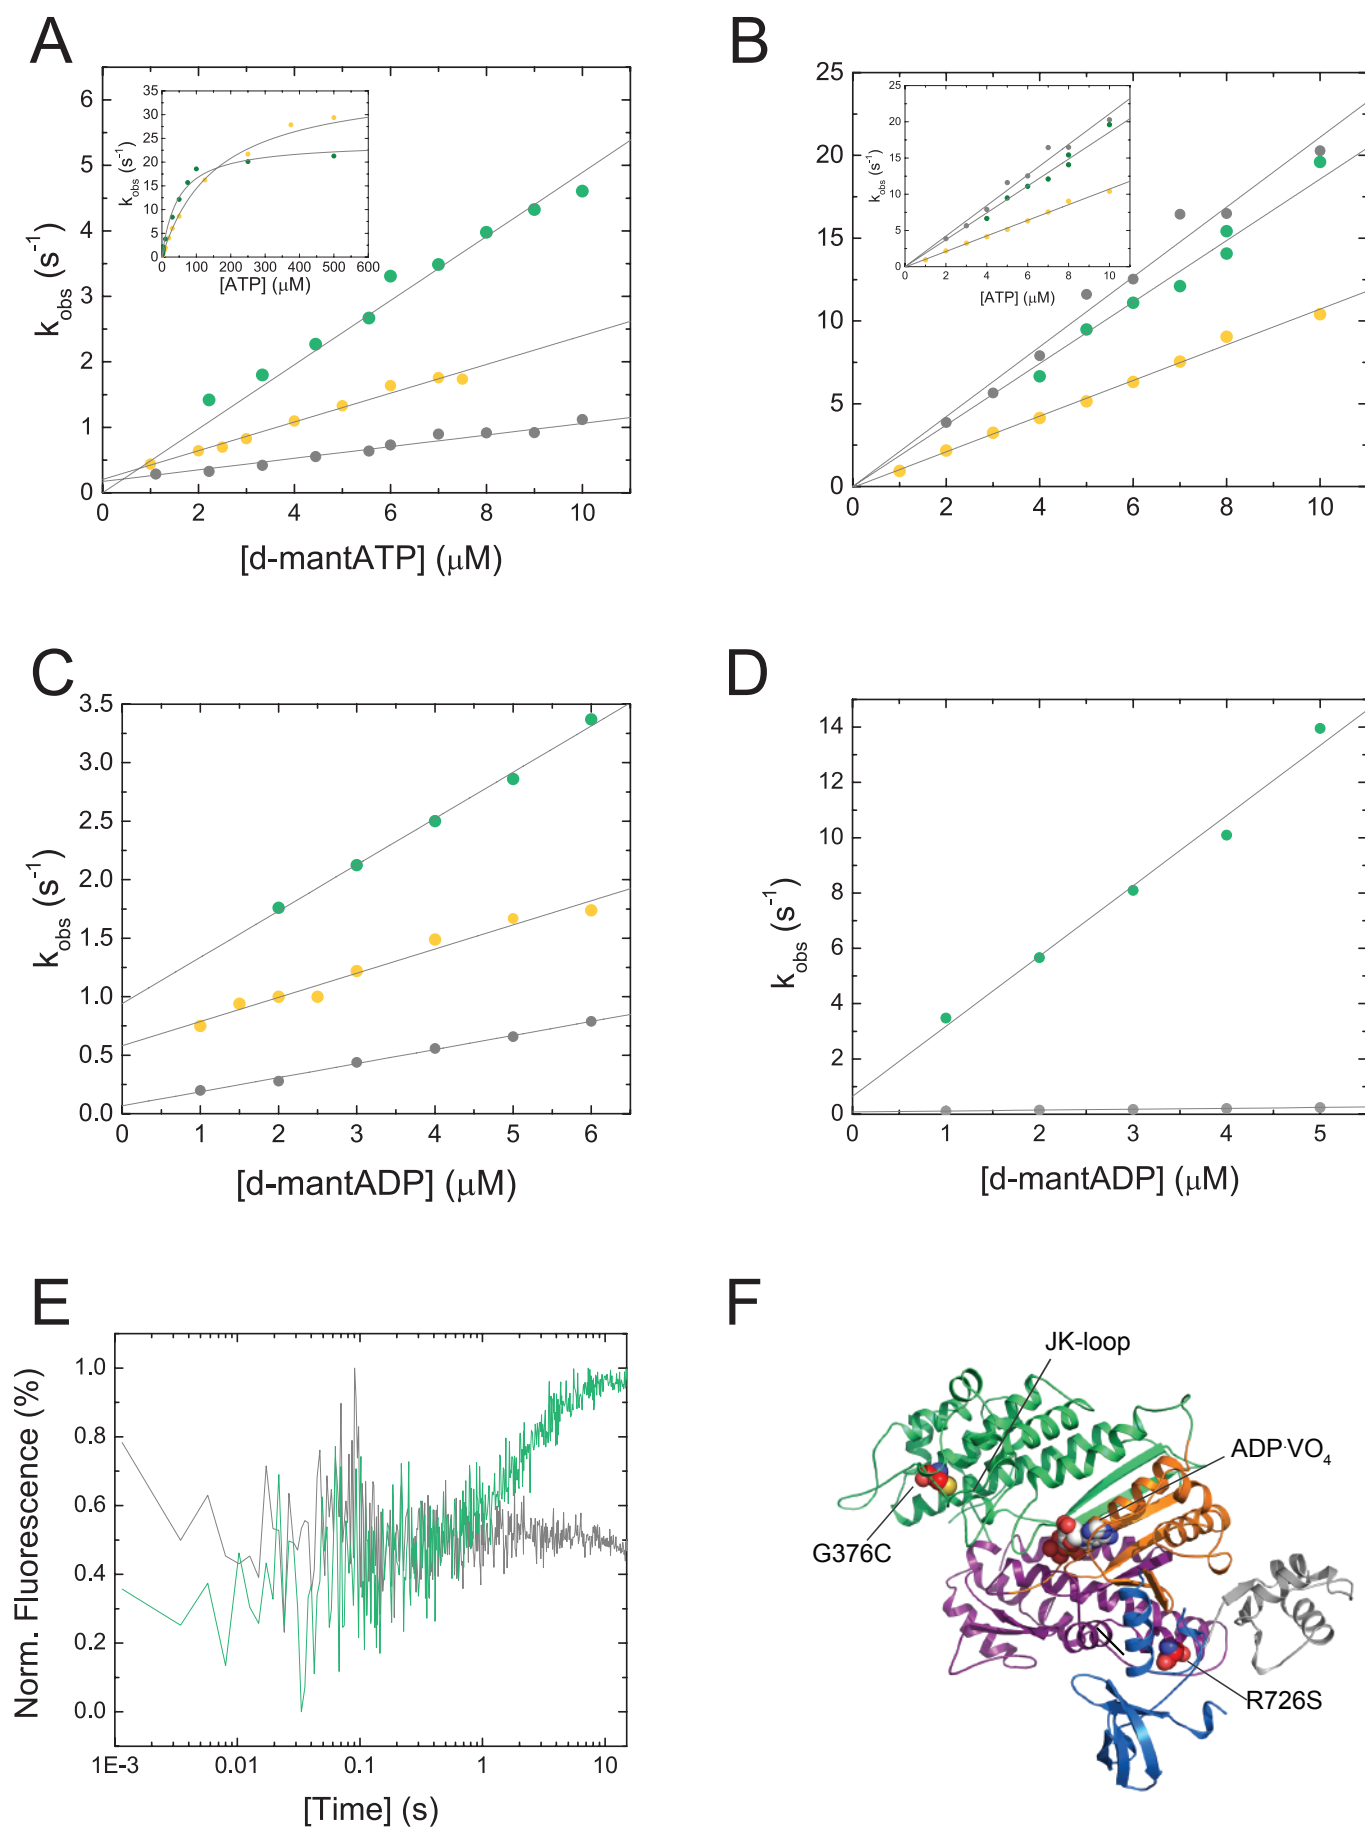

Supplement: supp [file elife-32742-supp-v1.zip]

Figure 5 - Figure supplement 1

A

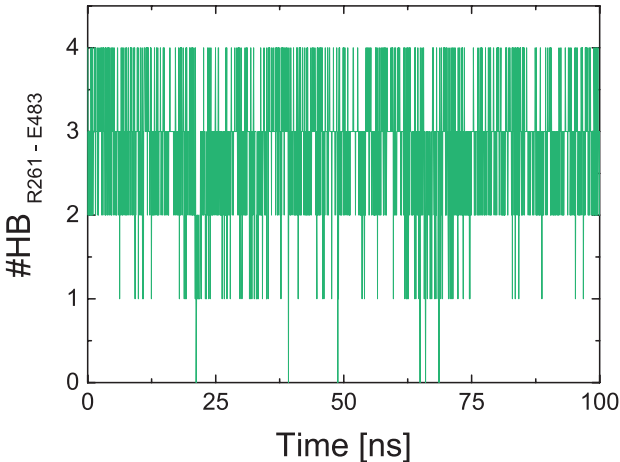

B

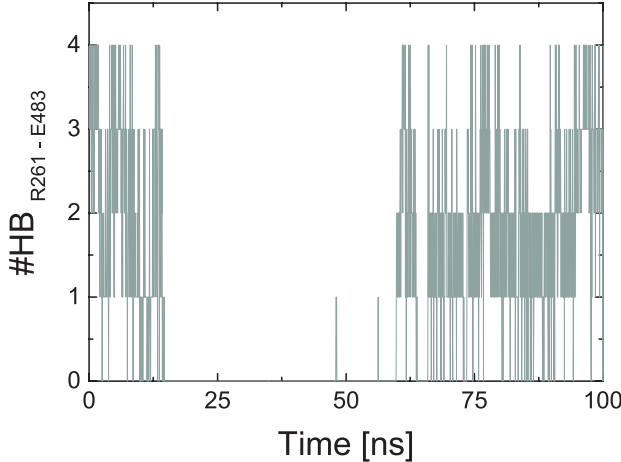

C

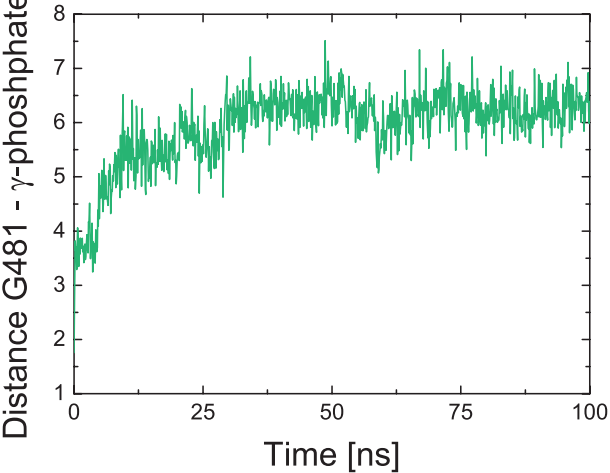

D

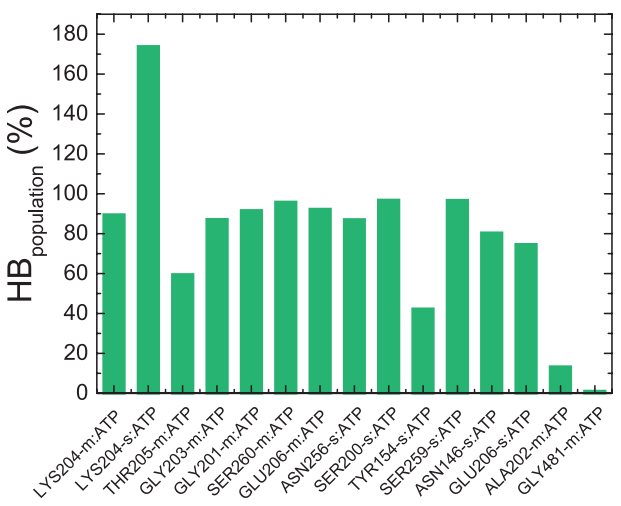

E

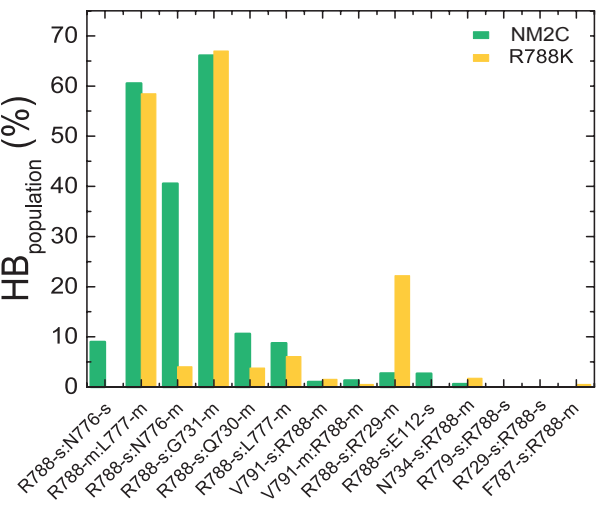

F

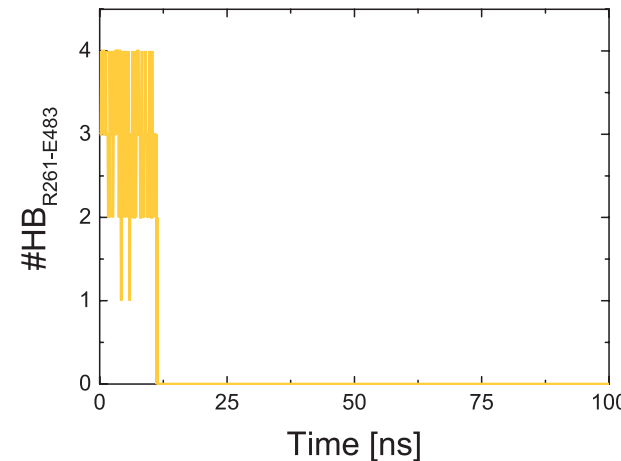

Supplement: supp [file elife-32742-supp-v1.zip]

# Figure 1 - Figure supplement 1

A

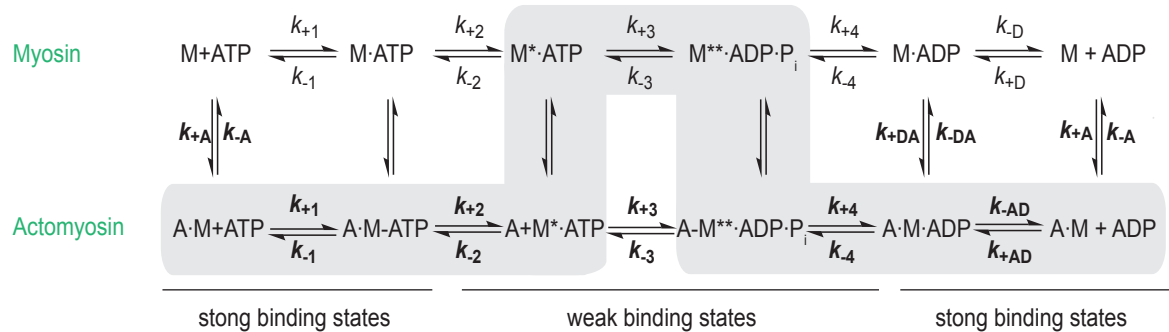

B

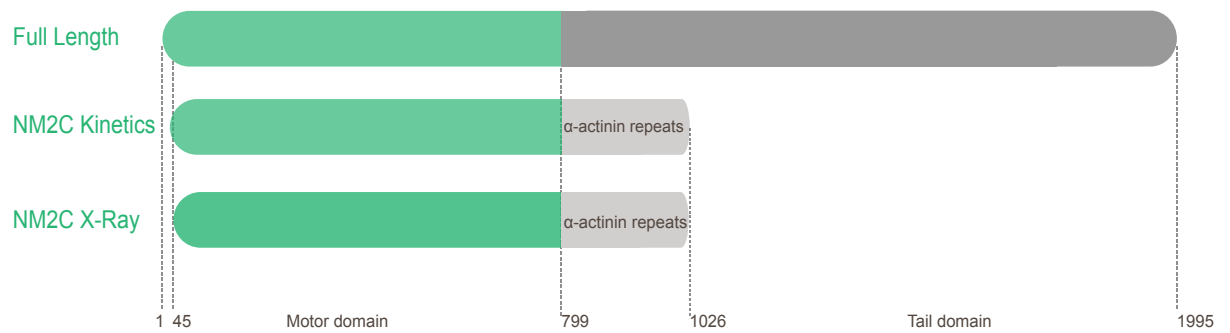

C

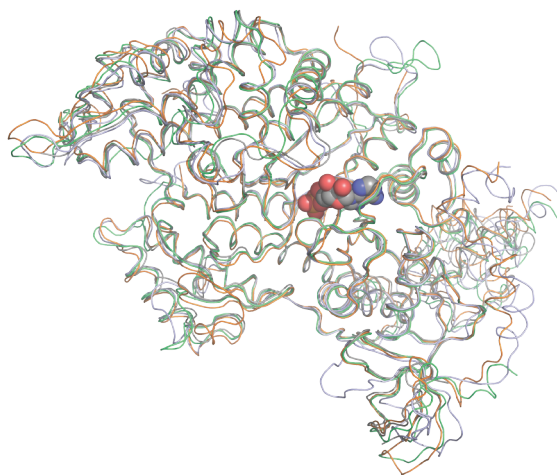

D

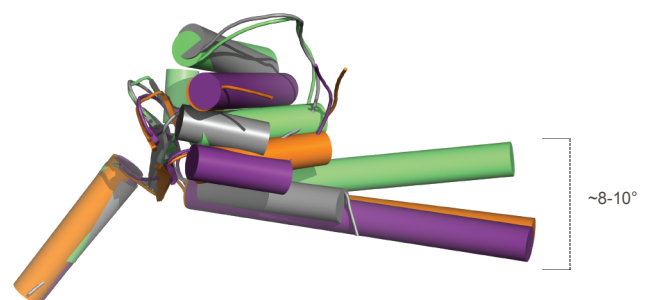

Supplement: supp [file elife-32742-supp-v1.zip]
